# Supplementary material
Source: PubMed Central journal article supplement (PMC4207720)
Supplement: NIHMS622350-supplement-Supplement.pdf [file NIHMS622350-supplement-Supplement.pdf]

**Table S1: The detail information of the cases with complications or failure ones**

| Case | Age | Target lesion |         | Blood     | Pressure | Stent    |            | Description                                | NIHSS increase until now | Time to recover |
|------|-----|---------------|---------|-----------|----------|----------|------------|--------------------------------------------|--------------------------|-----------------|
| #1   | 50s | RV4-BA        | Gateway | 2mm×15mm  | 8atm     | Wingspan | 4.5mm×20mm | Gastrointestinal hemorrhage                | 0                        | 0               |
| #2   | 60s | BA            | Gateway | 2mm×9mm   | 8atm     | Apollo   | 2.5mm×8mm  | minor stroke                               | 1                        | 48h             |
| #3   | 60s | RV4           | Gateway | 2mm×15mm  | 8atm     | Wingspan | 3.5mm×20   | Dissection                                 | 0                        | 24h             |
| #4   | 50s | LV4           | -       | -         | -        | Apollo   | 2.5mm×8mm  | SAH                                        | 10                       | disability      |
| #5   | 70s | BA            | Gateway | 1.5mm×9mm | -        | Wingspan | 4.0mm×15mm | Gateway couldn't pass lesion, Wingspan did | 0                        | 0               |
| #6   | 60s | RM1           | Gateway | 1.5mm×9mm | -        | -        | -          | Microguide wire couldn't pass              | 0                        | 0               |
| #7   | 40s | LM1           | -       | -         | -        | Apollo   | 2.5mm×8mm  | Stent couldn't pass lesion                 | 0                        | 0               |
| #8   | 40s | RM1           | -       | -         | -        | Apollo   | 2.5mm×8mm  | Stent couldn't pass lesion                 | 2                        | -               |
| #9   | 60s | BA            | Gateway | 1.5mm×9mm | -        | -        | -          | Balloon couldn't pass lesion               | 12                       | -               |
| #10  | 60s | LM1           | Gateway | 2mm×9mm   | 8atm     | wingspan | 3mm×15mm   | Apollo couldn't pass lesion, Wingspan did  | 1                        | -               |
| #11  | 60s | BA            | Gateway | 2mm×9mm   | -        | -        | -          | Balloon couldn't pass lesion               | 0                        | 0               |

**Abbreviations:** BA = basilar artery; RV4 = the intradural segment of right vertebral artery; LV4 = the 4<sup>th</sup> segment of left vertebral artery; RM1 = the horizontal segment of right middle cerebral artery; LM1 = the horizontal segment of left middle cerebral artery.
